# Supplementary material
Source: Springer Nature journal article supplement (https://www.springermedizin.de/resource/supplementary/13046_2008_115_MOESM5_ESM.pdf/9661660)

**- PIA**

**+ PIA**

**E-cadherin**

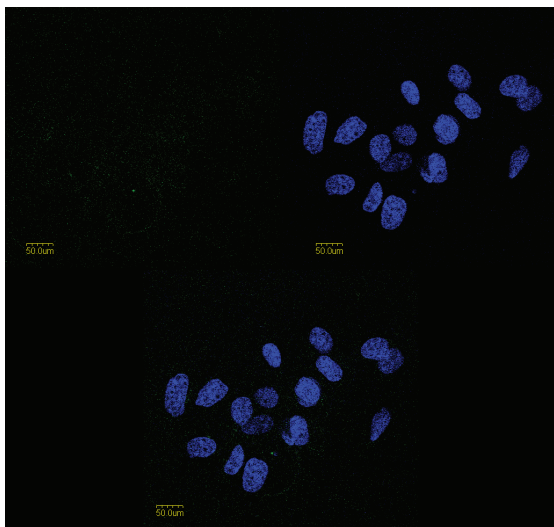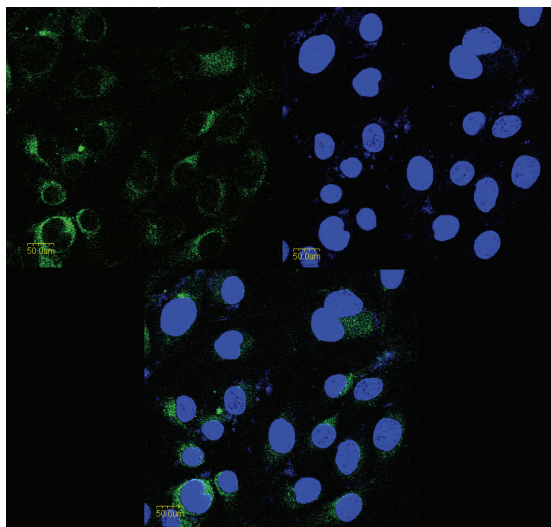

**$\beta$ -catenin**

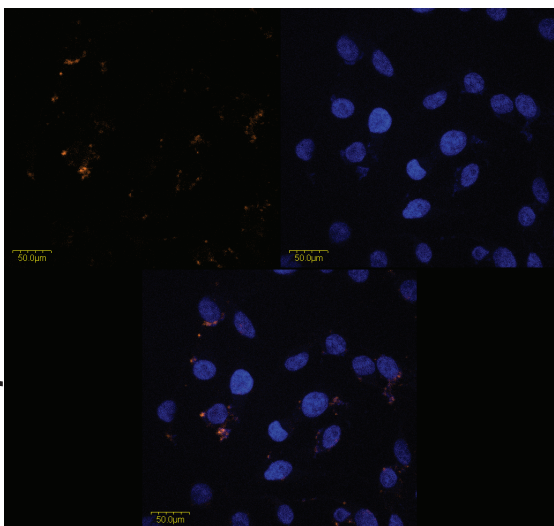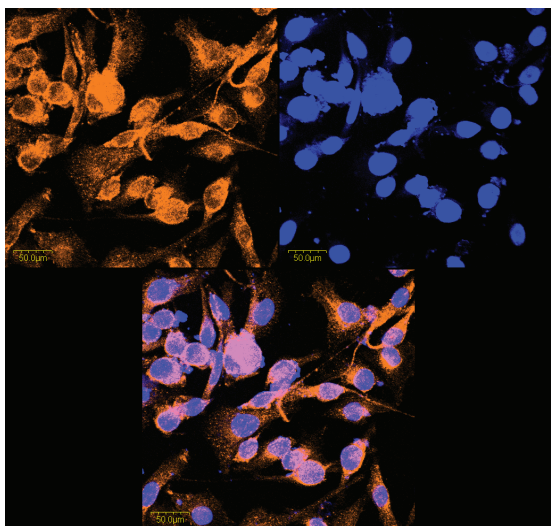

**Vimentin**

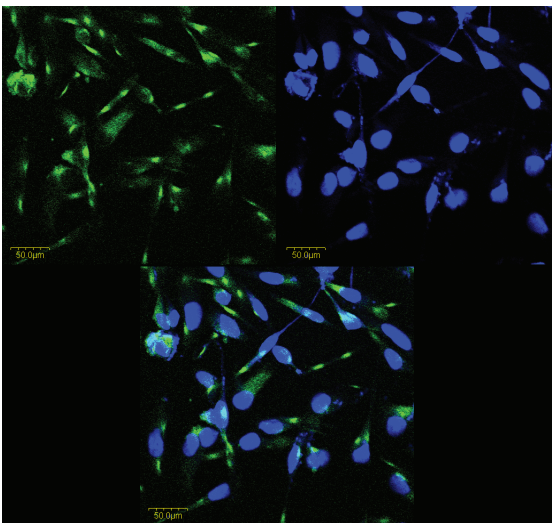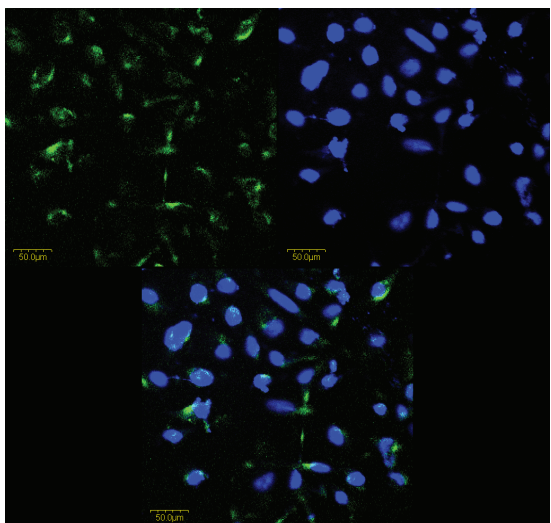

Supplement: MOESM5 [file 9661660]
